# Supplementary material
Source: PubMed Central journal article supplement (PMC275468)
Supplement: nar_31_21_6191__1.pdf [file nar_31_21_6191__1.pdf]

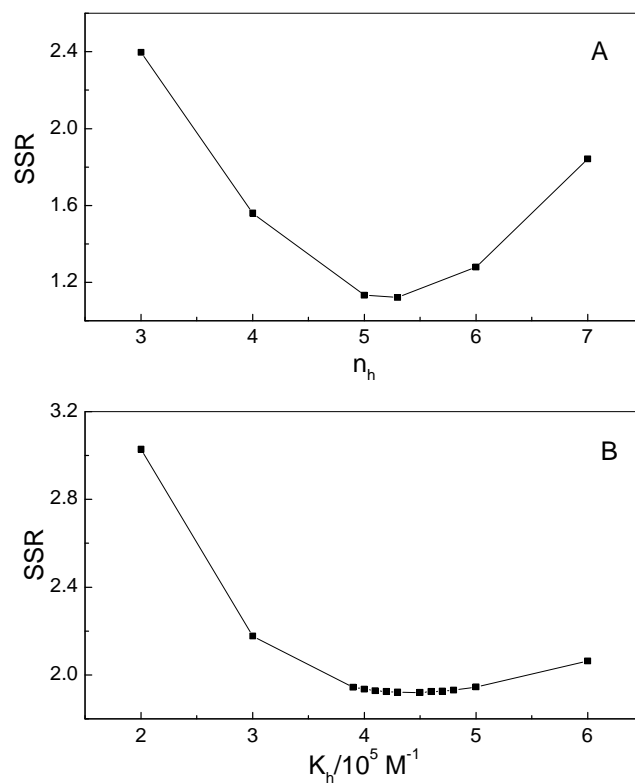

**Figure 1S.** Sum of the squares of the residuals (SSR) plot for the echinomycin site size (A) and binding constant (B) fit to the thermal denaturation data shown in figure 3. The minimum in these plots defines the best-fit values of the parameters to the experimental data. The shape and width of the plots provides an indication of the goodness of fit and the errors in the parameters.
